# Supplementary material for: A green approach for synthesizing silver nanoparticles, and their antibacterial and cytotoxic activities
Source: Royal Society of Chemistry journal article supplement (doi:10.1039/c7nj04224h), 2018-01-01
Supplement: c7nj04224h1.pdf [file c7nj04224h1.pdf]

## Supporting Information

A green approach of synthesizing of silver nanoparticles and their antibacterial and cytotoxicity activities

Yangqing He,<sup>\*a,b</sup> Xing Li,<sup>a</sup> Yuyu Zheng,<sup>a</sup> Zhiyan Wang,<sup>a</sup> Zhanying Ma,<sup>c</sup> Qian Yang,<sup>a</sup>  
Binghua Yao,<sup>a</sup> Yingjuan Zhao,<sup>a</sup> Hao Zhang<sup>\*d</sup>

<sup>a</sup> Department of Applied Chemistry, Xi'an University of Technology, Xi'an 710048, China

<sup>b</sup> Research Center for Micro & Nano Materials, Xi'an University of Technology, Xi'an 710048, China

<sup>c</sup> Department of Chemistry, Xianyang Normal University, Xianyang 712000, China

<sup>d</sup> Department of surgical oncology, The first affiliated hospital of Xi'an Jiaotong University, Xi'an 710061, China

To whom correspondence should be addressed. Tel: +86-29-82066360; Fax: +86-29-82066361. E-mail: [yqhe6@xaut.edu.cn](mailto:yqhe6@xaut.edu.cn) (Y.Q. He); [hao.zhang@mail.xjtu.edu.cn](mailto:hao.zhang@mail.xjtu.edu.cn) (H. Zhang)

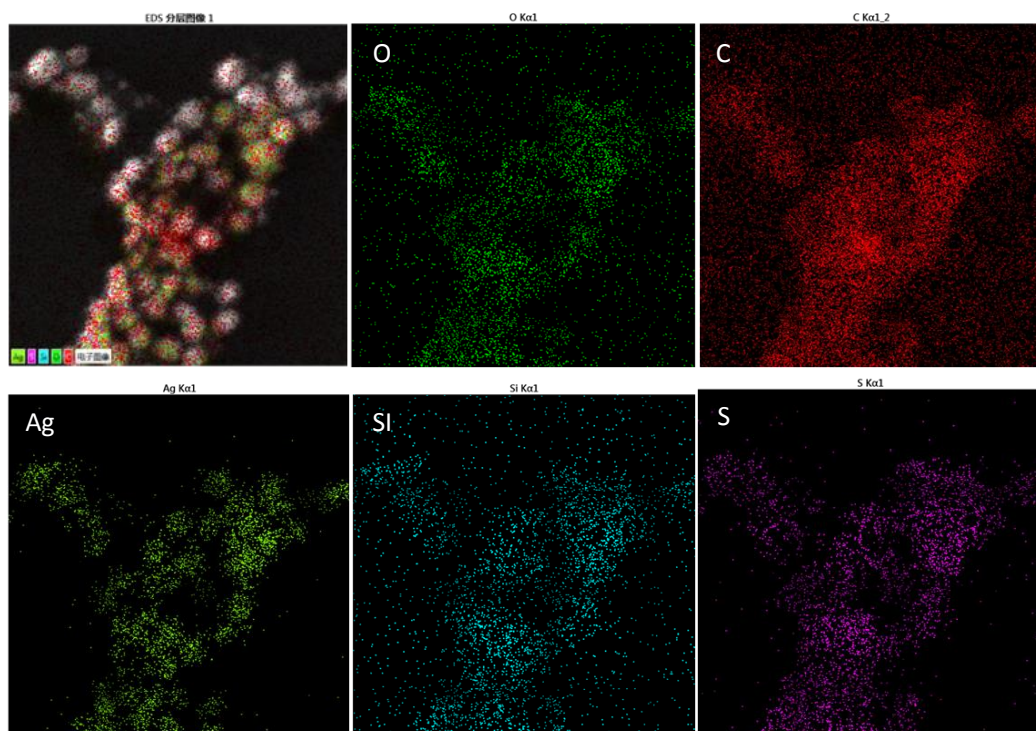

**Figure S1.** EDS spectrum of AgNPs prepared by 40 mL 1 mM AgNO<sub>3</sub> in 10 mL lotus extract at 60 °C.

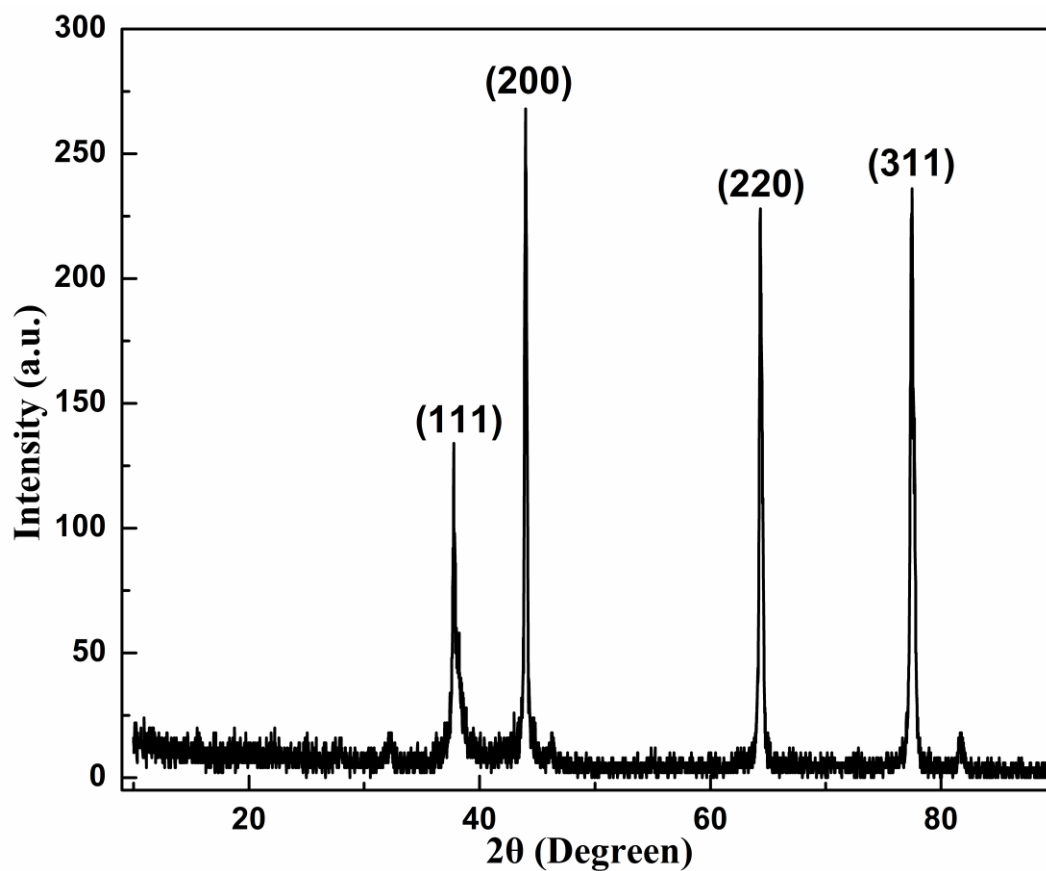

**Figure S2.** X-ray diffraction spectrum of AgNPs prepared by prepared by 40 mL 1 mM AgNO<sub>3</sub> in 10 mL lotus extract at 60 °C.

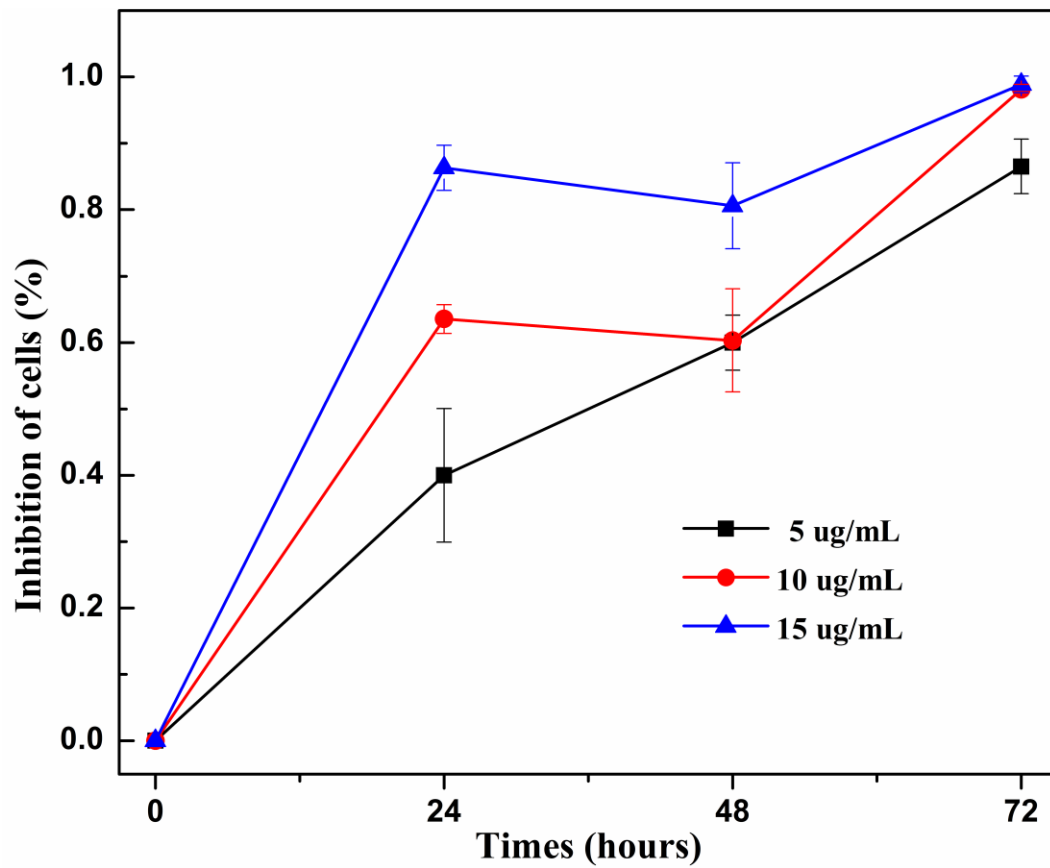

**Figure S3** Cytotoxic effect of various concentrations of AgNPs on SGC-7901 cell line.
